# Supplementary material for: PARP6 is a Regulator of Hippocampal Dendritic Morphogenesis
Source: PubMed Central journal article supplement (PMC4698753; doi:10.1038/srep18512), 2016-01-04
Supplement: srep18512-s1.pdf [file srep18512-s1.pdf]

**Supplementary Figures and Tables for:**

**PARP6 is a Regulator of Hippocampal Dendritic Morphogenesis**

Jeffrey Y. Huang<sup>1</sup>, Kang Wang<sup>2</sup>, Anke Vermehren-Schmaedick<sup>1</sup>, John P. Adelman<sup>2</sup>, and Michael S. Cohen<sup>1\*</sup>

<sup>1</sup>Department of Physiology and Pharmacology and <sup>2</sup>Vollum Institute, Oregon Health & Science University, Portland, Oregon 97210, United States

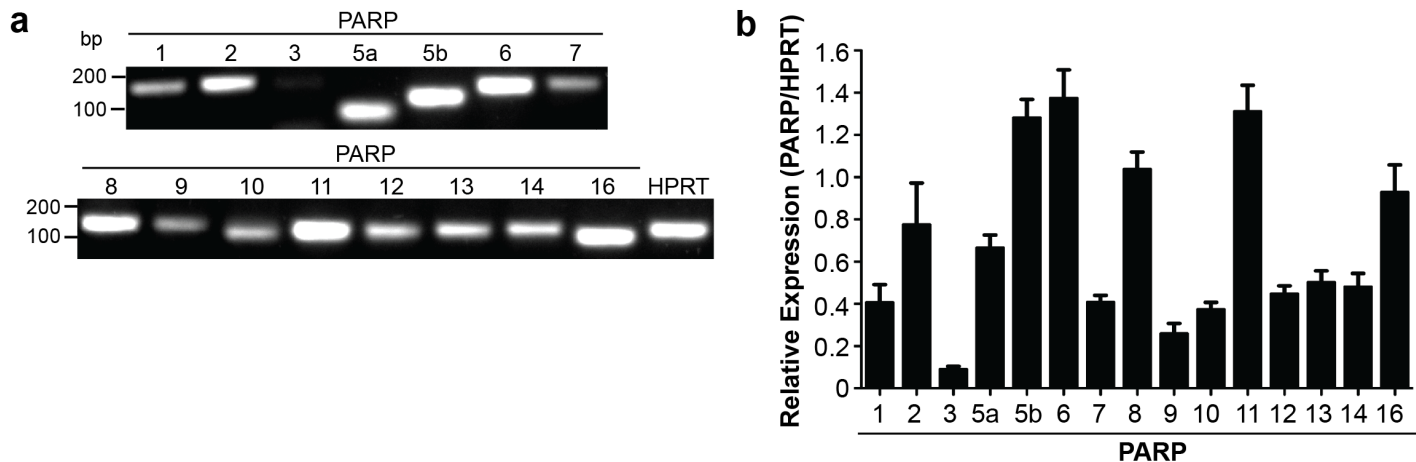

**Supplementary Figure 1. PARP6 is the most abundant PARP in E18 rat hippocampal neurons.**

(a) PARP family-wide mRNA expression profiling. RT-PCR was performed on cDNA from E18 rat hippocampal neurons. PARP-specific primer sequences used for RT-PCR are shown in **Supplementary table 1**.

Hypoxanthine phosphoribosyltransferase (HPRT) served as a control.

(b) Quantification of results shown in a. Data were obtained from three independent experiments. Error bars represent SEM.

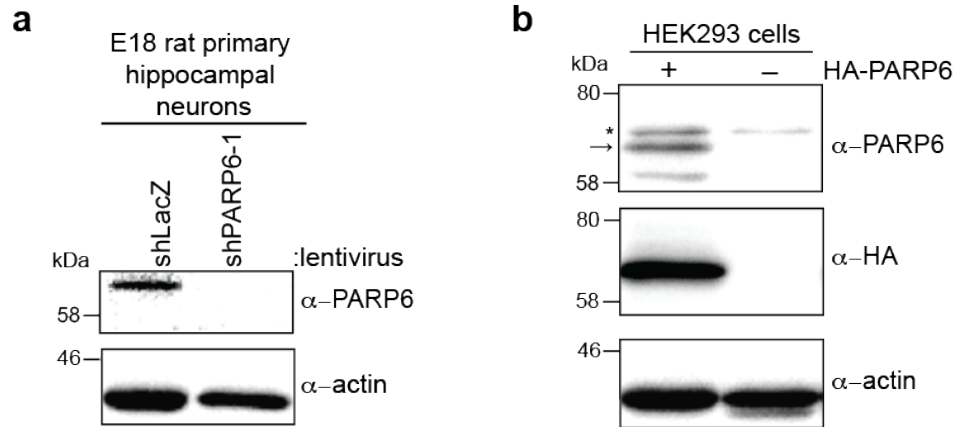

**Supplementary Figure 2. Specific detection of PARP6 using an anti-PARP6 antibody.**

**(a)** Validation of a commercially available PARP6 antibody using lentiviral mediated shRNA-based knockdown. E18 rat hippocampal neurons were transduced on day *in vitro* 0 (DIV0) with lentiviruses expressing either an shRNA targeting PARP6 (shPARP6-1) or LacZ (shLacZ). Neurons were harvested on DIV7 and proteins were resolved by SDS/PAGE and detected by Western blot with anti-PARP6 (Sigma; HPA026991) and anti-actin antibodies.

**(b)** Sigma anti-PARP6 detects HA-PARP6 overexpressed in HEK 293T cells. HEK 293T cells were transfected with HA-PARP6. Proteins were resolved by SDS/PAGE and detected by Western blot with anti-PARP6 (Sigma; HPA026991), anti-HA, and anti-actin antibodies. → denotes expected size of HA-PARP6 protein (~69 kDa), \*denotes putative higher-molecular weight full-length splice variant of PARP6 protein (~71 kDa).

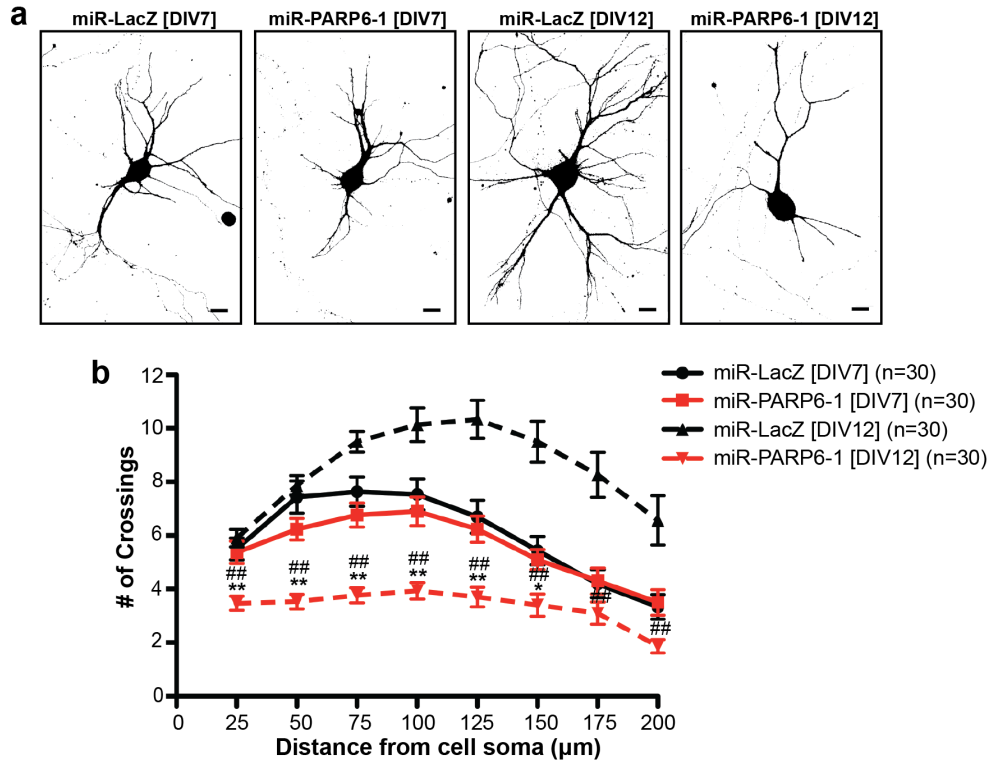

**Supplementary Figure 3. PARP6 knockdown reduces dendritic growth and maintenance.**

(a) E18 primary rat hippocampal neurons were transfected with miRNA-based knockdown plasmids on DIV6 and fixed on either DIV7 or DIV12. Shown are representative binary images generated from fluorescent images. Scale bar, 20 μm.

(b) Quantification of results in a using Sholl analysis. Error bars represent SEM. \* $p < 0.05$ , \*\* $p < 0.001$  (one-way ANOVA followed by Tukey's HSD test) compared to miR-LacZ [DIV7]; ### $p < 0.001$  (one-way ANOVA followed by Tukey's HSD test) compared to miR-LacZ [DIV12].

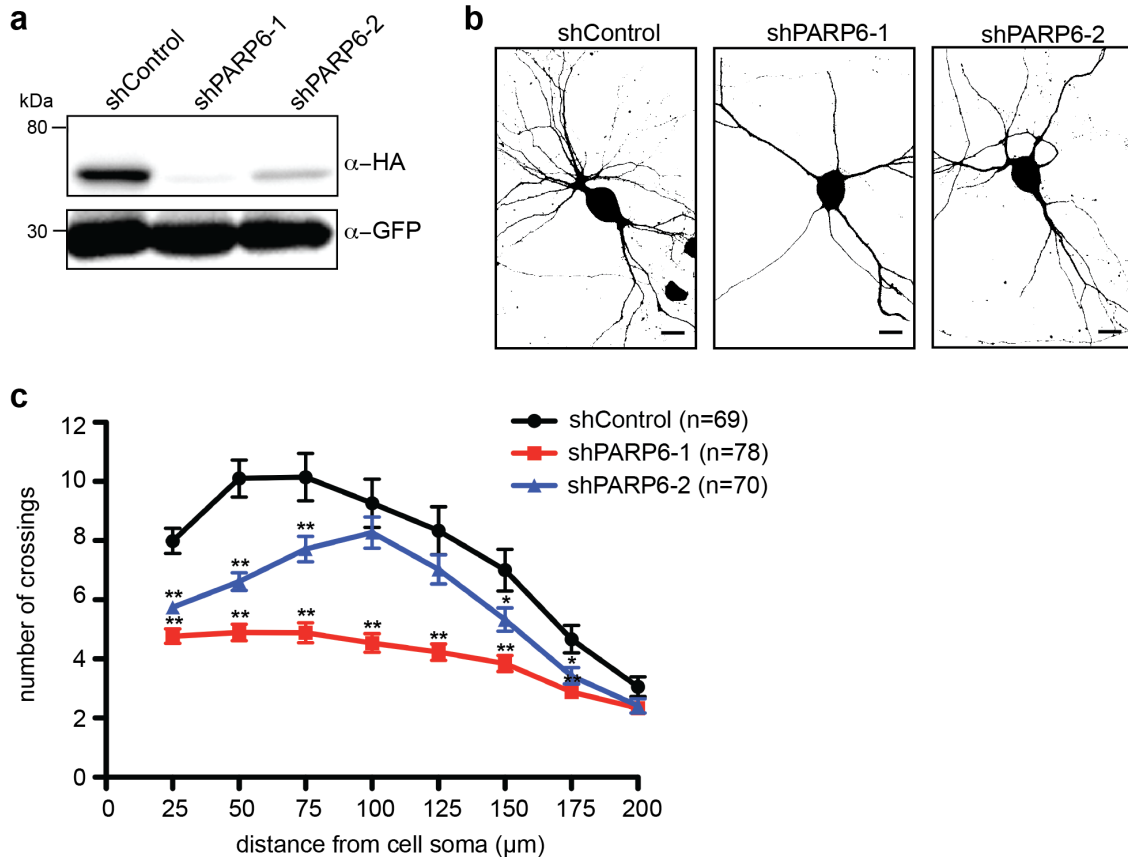

**Supplementary Figure 4. PARP6 regulates dendritic complexity in primary hippocampal neurons.**

(a) shRNA-based plasmids effectively knockdown PARP6 protein levels. HEK 293T cells were co-transfected with HA-PARP6 and GFP-expressing shRNA-based knockdown plasmids targeting rat PARP6 (shPARP6-1 or 2) or a non-targeting control (shControl). Proteins were resolved by SDS/PAGE and detected by Western blot with anti-HA and anti-GFP antibodies.

(b) Knockdown of PARP6 using shRNA-based plasmids decreased dendritic complexity. E18 primary rat hippocampal neurons were transfected with shRNA-based knockdown plasmids on DIV7 and fixed on DIV12. Shown are representative binary images generated from fluorescent images. Scale bar, 20  $\mu$ m.

(c) Quantification of results in b using Sholl analysis. Error bars represent SEM. \* $p < 0.05$ , \*\* $p < 0.001$  (one-way ANOVA followed by Tukey's HSD test) compared to shControl.

Cysteine-rich Domain (CRD)

|        |                 |                 |                                |
|--------|-----------------|-----------------|--------------------------------|
| mPARP6 | EQRIPTLNEYCVVCD | EQHVFQNGSMLKPAV | CTRELCVFSFYTLGVMSGAAEEVATGAEVV |
| hPARP6 | EQRIPTLNEYCVVCD | EQHVFQNGSMLKPAV | CTRELCVFSFYTLGVMSGAAEEVATGAEVV |
| rPARP6 | EQRVPTLNEYCVVCD | EQHVFQNGSMLKPAV | CTRELCVFSFYTLGVMSGAAEEVATGAEVV |
| xPARP6 | EQRLPTLNEYCVVCD | EQHVFQNASMLKPAV | CTRELCVFSFYTLGVMSGAAEEVATGAEVV |
| dPARP6 | EQRIPTLNDYCVVCD | EQHVFQNGSMLKPAV | CTRELCVFSFNTLGVMSGAAEDVATGAEVV |

266291

**Supplementary Figure 5. Alignment of PARP6 orthologues demonstrates conservation of the cysteine-rich domain (CRD).** mPARP6 = *Mus musculus* PARP6 (NM\_001205239); hPARP6 = *Homo sapiens* PARP6 (NM\_020214); rPARP6 = *Rattus norvegicus* PARP6 (NM\_001106828); xPARP6 = *Xenopus tropicalis* PARP6 (NP\_001090857); dPARP6 = *Danio rerio* PARP6 (XP\_009296376).

**Supplementary Table 1: PARP-specific primer sequences for endpoint-PCR expression profiling**

| <b>PARP</b> | <b>Forward Primer Sequence</b>            | <b>Reverse Primer Sequence</b>           | <b>Amplicon Length</b> |
|-------------|-------------------------------------------|------------------------------------------|------------------------|
| 1           | TCTACTTTGCTGATATGGTGTCC<br>(bp 2746-2768) | TGGGTAAC TTGCTGATGTGAG<br>(bp 2889-2869) | 144                    |
| 2           | GAAATTGCCCTTAAGCTGGTG<br>(bp 980-1000)    | TGGGTAGACTGTAAGTACTGGG<br>(bp 1128-1107) | 149                    |
| 3           | CTCGGAGAACAGCAAGTCAG<br>(bp 1349-1368)    | GGGTGGACTCTTCAAGCTG (bp<br>1490-1472)    | 142                    |
| 5a          | CACCGCCACAAGTTAATCAAG<br>(bp 3218-3238)   | AAGGTCAGATACGGATTGGTTC<br>(bp 3291-3270) | 74                     |
| 5b          | AGCGAGAACAGATCACCTTG (bp<br>2684-2703)    | ACCCCTTTAATGAGCCTGTG (bp<br>2789-2770)   | 106                    |
| 6           | CTCCGTGTCCATCAGAGAATATG<br>(bp 645-667)   | ACCGTAGCCTCAACACAATAG<br>(bp 781-761)    | 137                    |
| 7           | GTATGCCTGTCCTGATTCTG<br>(bp 586-606)      | TCTGCTACTGTGCCATTGATG<br>(bp 727-707)    | 142                    |
| 8           | ATGTTAGCCTTCAACCCAG (bp<br>2158-2177)     | CAGAAGTGGATGAGCAAGGG<br>(bp 2307-2288)   | 147                    |
| 9           | TGGGTGTAGAAGTGGGAGAG<br>(bp 1761-1780)    | TTGAACTTGTCTGGAGCTGAG<br>(bp 1910-1890)  | 150                    |

|    |                                           |                                           |     |
|----|-------------------------------------------|-------------------------------------------|-----|
| 10 | GAAATGGTGCTGTCAATGGAG<br>(bp 1210-1230)   | CCGAAAGCCAGTCACATCTAC<br>(bp 1335-1315)   | 126 |
| 11 | TGACTGGAGAATCAATGGTGTG<br>(bp 956-977)    | AAGCTGACCCCATGAATCTG (bp<br>1093-1074)    | 138 |
| 12 | TGTTTGTTAAGACCAAGCACAGA<br>(bp 3011-3033) | AGGCCACTATGCTCCTCTGA (bp<br>3152-3133)    | 142 |
| 13 | CGGTGGCAGATGTTTCGTATAT<br>(bp 1840-1860)  | GGTAGGAGTCACAGGTCATTTTC<br>(bp 1984-1962) | 145 |
| 14 | GACATTGGTATCTGCCGTAGG<br>(bp 5387-5407)   | TCAAGTGGTTGGCTCTCAAG (bp<br>5535-5516)    | 149 |
| 16 | CCGCCTAGAGAACTTCCATTC<br>(bp 582-602)     | CCGTGAGGACTATAAATGAGGG<br>(bp 710-689)    | 129 |

**Supplementary Table 2: PARP6 RNAi sequences**

| <b>RNAi constructs</b> | <b>Target Sequence</b>                   | <b>Species Specificity</b> |
|------------------------|------------------------------------------|----------------------------|
| miR-LacZ               | GACTACACAAATCAGCGATTC                    | N/A                        |
| miR-PARP6-1            | TTGCACCATGAAGAACCCAAA (bp 1125-<br>1145) | Mouse, Rat                 |
| miR-PARP6-2            | GGGCTCATATTTGGAAATCAA (bp 1674-<br>1694) | Mouse, Rat                 |



|             |                                      |            |
|-------------|--------------------------------------|------------|
| miR-PARP6-3 | CTACACTAAACTGCAGCTGCA (bp 1959-1979) | Rat        |
| shControl   | ACTACCGTTGTTATAGGTGTC                | N/A        |
| shPARP6-1   | TTGCACCATGAAGAACCCAAA (bp 1125-1145) | Mouse, Rat |
| shPARP6-2   | GATGACCCAGGGCTCATATTT (bp 1665-1685) | Mouse, Rat |
